# Supplementary material
Source: ML conference proceedings conference paper supplement (https://proceedings.neurips.cc/paper_files/paper/2018/hash/b4568df26077653eeadf29596708c94b-Abstract.html)
Supplement: Supplementary file [file b4568df26077653eeadf29596708c94b-Supplemental.zip]

## Supplementary Materials

The proof of Theorem 1 is based on the results in other theorems. Thus, we postpone its proof to the end of the supplementary material.

### Proof of Theorem 2

**Theorem 2.** *Let Assumption 1 hold and assume problem (P) satisfies the KL property associated with parameter  $\theta \in (0, 1]$ . Then, there exists a sufficiently large  $k_0 \in \mathbb{N}$  such that for all  $k \geq k_0$  the sequence  $\{f(\mathbf{x}_k)\}_k$  generated by CR satisfies*

1. *If  $\theta = 1$ , then  $f(\mathbf{x}_k) \downarrow \bar{f}$  within finite number of iterations;*
2. *If  $\theta \in (\frac{1}{3}, 1)$ , then  $f(\mathbf{x}_k) \downarrow \bar{f}$  super-linearly as  $f(\mathbf{x}_{k+1}) - \bar{f} \leq \Theta\left(\exp\left(-\left(\frac{2}{3(1-\theta)}\right)^{k-k_0}\right)\right)$ ;*
3. *If  $\theta = \frac{1}{3}$ , then  $f(\mathbf{x}_k) \downarrow \bar{f}$  linearly as  $f(\mathbf{x}_{k+1}) - \bar{f} \leq \Theta\left(\exp\left(-(k - k_0)\right)\right)$ ;*
4. *If  $\theta \in (0, \frac{1}{3})$ , then  $f(\mathbf{x}_k) \downarrow \bar{f}$  sub-linearly as  $f(\mathbf{x}_{k+1}) - \bar{f} \leq \Theta\left((k - k_0)^{-\frac{2}{1-3\theta}}\right)$ .*

*Proof.* We first recall the following fundamental result proved in Nesterov and Polyak (2006), which serves as a convenient reference.

**Theorem 5** (Theorem 2, Nesterov and Polyak (2006)). *Let Assumption 1 hold. Then, the sequence  $\{\mathbf{x}_k\}_k$  generated by CR satisfies*

1. *The set of limit points  $\omega(\mathbf{x}_0)$  of  $\{\mathbf{x}_k\}_k$  is nonempty and compact, all of which are second-order stationary points;*
2. *The sequence  $\{f(\mathbf{x}_k)\}_k$  decreases to a finite limit  $\bar{f}$ , which is the constant function value evaluated on the set  $\omega(\mathbf{x}_0)$ .*

From the results of Theorem 5 we conclude that  $\text{dist}_{\omega(\mathbf{x}_0)}(\mathbf{x}_k) \rightarrow 0$ ,  $f(\mathbf{x}_k) \downarrow \bar{f}$  and  $\omega(\mathbf{x}_0)$  is a compact set on which the function value is the constant  $\bar{f}$ . Then, it is clear that for any fixed  $\epsilon > 0, \lambda > 0$  and all  $k \geq k_0$  with  $k_0$  being sufficiently large,  $\mathbf{x}_k \in \{\mathbf{x} : \text{dist}_{\omega(\mathbf{x}_0)}(\mathbf{x}) < \epsilon, \bar{f} < f(\mathbf{x}) < \bar{f} + \lambda\}$ . Hence, all the conditions of the KL property in Definition 1 are satisfied, and we can exploit the KL inequality in eq. (2).

Denote  $r_k := f(\mathbf{x}_k) - \bar{f}$ . For all  $k \geq k_0$  we obtain that

$$r_k \stackrel{(i)}{\leq} C \|\nabla f(\mathbf{x}_k)\| \stackrel{(ii)}{\leq} C \|\mathbf{x}_k - \mathbf{x}_{k-1}\| \stackrel{(iii)}{\leq} C (r_{k-1} - r_k)^{\frac{2}{3(1-\theta)}}, \quad (9)$$

where (i) follows from the KL property in eq. (3), (ii) and (iii) follow from the dynamics of CR in Table 1 and we have absorbed all constants into  $C$ . Define  $\delta_k = r_k C^{\frac{3(1-\theta)}{3\theta-1}}$ , then the above inequality can be rewritten as

$$\delta_{k-1} - \delta_k \geq \delta_k^{\frac{3(1-\theta)}{2}}, \quad \forall k \geq k_0. \quad (10)$$

Next, we discuss the convergence rate of  $\delta_k$  under different regimes of  $\theta$ .

**Case 1:**  $\theta = 1$ .

In this case, the KL property in eq. (2) satisfies  $\varphi'(t) = c$  and implies that  $\|\nabla f(\mathbf{x}_k)\| \geq \frac{1}{c}$  for some constant  $c > 0$ . On the other hand, by the dynamics of CR in Table 1, we obtain that

$$f(\mathbf{x}_{k+1}) \leq f(\mathbf{x}_k) - \frac{M}{12} \|\mathbf{x}_{k+1} - \mathbf{x}_k\|^3 \leq f(\mathbf{x}_k) - \frac{M}{12} \left(\frac{2}{L+M}\right)^{\frac{3}{2}} \|\nabla f(\mathbf{x}_k)\|^{\frac{3}{2}}. \quad (11)$$

Combining these two facts yields the conclusion that for all  $k \geq k_0$

$$f(\mathbf{x}_{k+1}) \leq f(\mathbf{x}_k) - C$$

for some constant  $C > 0$ . Then, we conclude that  $f(\mathbf{x}_k) \downarrow -\infty$ , which contradicts the fact that  $f(\mathbf{x}_k) \downarrow \bar{f} > -\infty$  (since  $f$  is bounded below). Hence, we must have  $f(\mathbf{x}_k) \equiv \bar{f}$  for all sufficiently large  $k$ .

**Case 2:**  $\theta \in (\frac{1}{3}, 1)$ .

In this case  $0 < \frac{3(1-\theta)}{2} < 1$ . Since  $\delta_k \rightarrow 0$  as  $r_k \rightarrow 0$ ,  $\delta_k^{\frac{3(1-\theta)}{2}}$  is order-wise larger than  $\delta_k$  for all sufficiently large  $k$ . Hence, for all sufficiently large  $k$ , eq. (10) reduces to

$$\delta_{k-1} \geq \delta_k^{\frac{3(1-\theta)}{2}}. \quad (12)$$

It follows that  $\delta_k \downarrow 0$  super-linearly as  $\delta_k \leq \delta_{k-1}^{\frac{2}{3(1-\theta)}}$ . Since  $\delta_k = r_k C^{\frac{2}{1-3\theta}}$ , we conclude that  $r_k \downarrow 0$  super-linearly as  $r_k \leq C_1 r_{k-1}^{\frac{2}{3(1-\theta)}}$  for some constant  $C_1 > 0$ . By letting  $k_0$  be sufficiently large so that  $r_{k_0}$  is sufficiently small, we obtain that

$$r_k \leq C_1 r_{k-1}^{\frac{2}{3(1-\theta)}} \leq C_1^{k-k_0} r_{k_0}^{\left(\frac{2}{3(1-\theta)}\right)^{k-k_0}} = \Theta\left(\exp\left(-\left(\frac{2}{3(1-\theta)}\right)^{k-k_0}\right)\right). \quad (13)$$

**Case 3:**  $\theta = \frac{1}{3}$ .

In this case  $\frac{3(1-\theta)}{2} = 1$ , and eq. (9) reduces to  $r_k \leq C(r_{k-1} - r_k)$ , i.e.,  $r_k \downarrow 0$  linearly as  $r_k \leq \frac{C}{1+C} r_{k-1}$  for some constant  $C > 0$ . Thus, we obtain that for all  $k \geq k_0$

$$r_k \leq \left(\frac{C}{1+C}\right)^{k-k_0} r_{k_0} = \Theta\left(\exp(-(k-k_0))\right). \quad (14)$$

**Case 4:**  $\theta \in (0, \frac{1}{3})$ .

In this case,  $1 < \frac{3(1-\theta)}{2} < \frac{3}{2}$  and  $-\frac{1}{2} < \frac{3\theta-1}{2} < 0$ . Since  $\delta_k \downarrow 0$ , we conclude that for all  $k \geq k_0$

$$\delta_{k-1}^{-\frac{3(1-\theta)}{2}} < \delta_k^{-\frac{3(1-\theta)}{2}}, \quad \delta_{k-1}^{\frac{3\theta-1}{2}} < \delta_k^{\frac{3\theta-1}{2}}. \quad (15)$$

Define an auxiliary function  $\phi(t) := \frac{2}{1-3\theta} t^{\frac{3\theta-1}{2}}$  so that  $\phi'(t) = -t^{\frac{3(\theta-1)}{2}}$ . We next consider two cases. First, suppose that  $\delta_k^{\frac{3(\theta-1)}{2}} \leq 2\delta_{k-1}^{\frac{3(\theta-1)}{2}}$ . Then for all  $k \geq k_0$

$$\phi(\delta_k) - \phi(\delta_{k-1}) = \int_{\delta_{k-1}}^{\delta_k} \phi'(t) dt = \int_{\delta_k}^{\delta_{k-1}} t^{\frac{3(\theta-1)}{2}} dt \geq (\delta_{k-1} - \delta_k) \delta_{k-1}^{\frac{3(\theta-1)}{2}} \quad (16)$$

$$\stackrel{(i)}{\geq} \frac{1}{2} (\delta_{k-1} - \delta_k) \delta_k^{\frac{3(\theta-1)}{2}} \stackrel{(ii)}{\geq} \frac{1}{2}, \quad (17)$$

where (i) utilizes the assumption and (ii) uses eq. (10).

Second, suppose that  $\delta_k^{\frac{3(\theta-1)}{2}} \geq 2\delta_{k-1}^{\frac{3(\theta-1)}{2}}$ . Then  $\delta_k^{\frac{3\theta-1}{2}} \geq 2^{\frac{3\theta-1}{3(\theta-1)}} \delta_{k-1}^{\frac{3\theta-1}{2}}$ , which further leads to

$$\phi(\delta_k) - \phi(\delta_{k-1}) = \frac{2}{1-3\theta} (\delta_k^{\frac{3\theta-1}{2}} - \delta_{k-1}^{\frac{3\theta-1}{2}}) \geq \frac{2}{1-3\theta} (2^{\frac{3\theta-1}{3(\theta-1)}} - 1) \delta_{k-1}^{\frac{3\theta-1}{2}} \quad (18)$$

$$\geq \frac{2}{1-3\theta} (2^{\frac{3\theta-1}{3(\theta-1)}} - 1) \delta_{k_0}^{\frac{3\theta-1}{2}}. \quad (19)$$

Combining the above two cases and defining  $C := \min\{\frac{1}{2}, \frac{2}{1-3\theta} (2^{\frac{3\theta-1}{3(\theta-1)}} - 1) \delta_{k_0}^{\frac{3\theta-1}{2}}\}$ , we conclude that for all  $k \geq k_0$

$$\phi(\delta_k) - \phi(\delta_{k-1}) \geq C, \quad (20)$$

which further implies that

$$\phi(\delta_k) \geq \sum_{i=k_0+1}^k \phi(\delta_i) - \phi(\delta_{i-1}) \geq C(k-k_0). \quad (21)$$

Substituting the form of  $\phi$  into the above inequality and simplifying the expression yields  $\delta_k \leq \left(\frac{2}{C(1-3\theta)(k-k_0)}\right)^{\frac{2}{1-3\theta}}$ . It follows that  $r_k \leq \left(\frac{C_3}{k-k_0}\right)^{\frac{2}{1-3\theta}}$  for some  $C_3 > 0$ .  $\square$

### Proof of Theorem 3

**Theorem 3.** *Let Assumption 1 hold and assume that problem (P) satisfies the KL property. Then, the sequence  $\{\mathbf{x}_k\}_k$  generated by CR satisfies*

$$\sum_{k=0}^{\infty} \|\mathbf{x}_{k+1} - \mathbf{x}_k\| < +\infty. \quad (4)$$

*Proof.* Recall the definition that  $r_k := f(\mathbf{x}_k) - \bar{f}$ , where  $\bar{f}$  is the finite limit of  $\{f(\mathbf{x}_k)\}_k$ . Also, recall that  $k_0 \in \mathbb{N}$  is a sufficiently large integer. Then, for all  $k \geq k_0$ , the KL property implies that

$$\varphi'(r_k) \geq \frac{1}{\|\nabla f(\mathbf{x}_k)\|} \geq \frac{2}{(L+M)\|\mathbf{x}_k - \mathbf{x}_{k-1}\|^2}, \quad (22)$$

where the last inequality uses the dynamics of CR in Table 1. Note that  $\varphi(t) = \frac{c}{\theta} t^\theta$  is concave for  $\theta \in (0, 1]$ . Then, by concavity we obtain that

$$\varphi(r_k) - \varphi(r_{k+1}) \geq \varphi'(r_k)(r_k - r_{k+1}) \geq \frac{M}{6(L+M)} \frac{\|\mathbf{x}_{k+1} - \mathbf{x}_k\|^3}{\|\mathbf{x}_k - \mathbf{x}_{k-1}\|^2}, \quad (23)$$

where the last inequality uses eq. (22) and the dynamics of CR in Table 1. Rearranging the above inequality, taking cubic root and summing over  $k = k_0, \dots, n$  yield that (all constants are absorbed in  $C$ )

$$\sum_{k=k_0}^n \|\mathbf{x}_{k+1} - \mathbf{x}_k\| \leq C \sum_{k=k_0}^n (\varphi(r_k) - \varphi(r_{k+1}))^{\frac{1}{3}} \|\mathbf{x}_k - \mathbf{x}_{k-1}\|^{\frac{2}{3}} \quad (24)$$

$$\stackrel{(i)}{\leq} C \left[ \sum_{k=k_0}^n (\varphi(r_k) - \varphi(r_{k+1})) \right]^{\frac{1}{3}} \left[ \sum_{k=k_0}^n \|\mathbf{x}_k - \mathbf{x}_{k-1}\| \right]^{\frac{2}{3}} \quad (25)$$

$$\stackrel{(ii)}{\leq} C [\varphi(r_{k_0})]^{\frac{1}{3}} \left[ \sum_{k=k_0}^n \|\mathbf{x}_{k+1} - \mathbf{x}_k\| + \|\mathbf{x}_{k_0} - \mathbf{x}_{k_0-1}\| \right]^{\frac{2}{3}}, \quad (26)$$

where (i) applies the Hölder's inequality and (ii) uses the fact that  $\varphi \geq 0$ . Clearly, we must have  $\lim_{n \rightarrow \infty} \sum_{k=k_0}^n \|\mathbf{x}_{k+1} - \mathbf{x}_k\| < +\infty$ , because otherwise the above inequality cannot hold for all  $n$  sufficiently large. We then conclude that

$$\sum_{k=k_0}^{\infty} \|\mathbf{x}_{k+1} - \mathbf{x}_k\| < +\infty,$$

and the desired result follows because  $k_0$  is a fixed number. □

### Proof of Theorem 4

**Theorem 4.** *Let Assumption 1 hold and assume that problem (P) satisfies the KL property. Then, there exists a sufficiently large  $k_0 \in \mathbb{N}$  such that for all  $k \geq k_0$  the sequence  $\{\mathbf{x}_k\}_k$  generated by CR satisfies*

1. If  $\theta = 1$ , then  $\mathbf{x}_k \rightarrow \bar{\mathbf{x}}$  within finite number of iterations;
2. If  $\theta \in (\frac{1}{3}, 1)$ , then  $\mathbf{x}_k \rightarrow \bar{\mathbf{x}}$  super-linearly as  $\|\mathbf{x}_{k+1} - \bar{\mathbf{x}}\| \leq \Theta\left(\exp\left(-\left(\frac{2\theta}{3(1-\theta)} + \frac{2}{3}\right)^{k-k_0}\right)\right)$ ;
3. If  $\theta = \frac{1}{3}$ , then  $\mathbf{x}_k \rightarrow \bar{\mathbf{x}}$  linearly as  $\|\mathbf{x}_{k+1} - \bar{\mathbf{x}}\| \leq \Theta\left(\exp\left(-(k-k_0)\right)\right)$ ;
4. If  $\theta \in (0, \frac{1}{3})$ , then  $\mathbf{x}_k \rightarrow \bar{\mathbf{x}}$  sub-linearly as  $\|\mathbf{x}_{k+1} - \bar{\mathbf{x}}\| \leq \Theta\left((k-k_0)^{-\frac{2\theta}{1-3\theta}}\right)$ .

*Proof.* We prove the theorem case by case.

**Case 1:  $\theta = 1$ .**

We have shown in case 1 of Theorem 2 that  $f(\mathbf{x}_k) \downarrow \bar{f}$  within finite number of iterations, i.e.,  $f(\mathbf{x}_{k+1}) - f(\mathbf{x}_k) = 0$  for all  $k \geq k_0$ . Based on this observation, the dynamics of CR in Table 1 further implies that for all  $k \geq k_0$

$$0 = f(\mathbf{x}_{k+1}) - f(\mathbf{x}_k) \leq -\frac{M}{12} \|\mathbf{x}_{k+1} - \mathbf{x}_k\|^3 \leq 0. \quad (27)$$

Hence, we conclude that  $\mathbf{x}_{k+1} = \mathbf{x}_k$  for all  $k \geq k_0$ , i.e.,  $\mathbf{x}_k$  converges within finite number of iterations. Since Theorem 3 shows that  $\mathbf{x}_k$  converges to some  $\bar{\mathbf{x}}$ , the desired conclusion follows.

**Case 2:  $\theta \in (\frac{1}{3}, 1)$ .**

Denote  $\Delta_k := \sum_{i=k}^{\infty} \|\mathbf{x}_{i+1} - \mathbf{x}_i\|$ . Note that Theorem 3 shows that  $\mathbf{x}_k \rightarrow \bar{\mathbf{x}}$ . Thus, we have  $\|\mathbf{x}_k - \bar{\mathbf{x}}\| \leq \Delta_k$ . Next, we derive the convergence rate of  $\Delta_k$ .

By Theorem 3,  $\lim_{n \rightarrow \infty} \sum_{i=k}^n \|\mathbf{x}_{i+1} - \mathbf{x}_i\|$  exists for all  $k$ . Then, we can let  $n \rightarrow \infty$  in eq. (26) and obtain that for all  $k \geq k_0$

$$\Delta_k \leq C[\varphi(r_k)]^{\frac{1}{3}} \Delta_{k-1}^{\frac{2}{3}} \leq Cr_k^{\frac{\theta}{3}} \Delta_{k-1}^{\frac{2}{3}} \stackrel{(i)}{\leq} C(\Delta_{k-1} - \Delta_k)^{\frac{2\theta}{3(1-\theta)}} \Delta_{k-1}^{\frac{2}{3}} \leq C\Delta_{k-1}^{\frac{2\theta}{3(1-\theta)} + \frac{2}{3}}, \quad (28)$$

where  $C$  denotes a universal constant that may vary from line to line, and (i) uses the KL property and the dynamics of CR, i.e.,  $r_k \leq C\|\nabla f(\mathbf{x}_k)\|^{\frac{1}{1-\theta}} \leq C\|\mathbf{x}_k - \mathbf{x}_{k-1}\|^{\frac{2}{1-\theta}}$ . Note that in this case we have  $\frac{2\theta}{3(1-\theta)} + \frac{2}{3} > 1$ , and hence the above inequality implies that  $\Delta_k$  converges to zero super-linearly as

$$\Delta_k \leq C^{k-k_0} \Delta_{k_0}^{\left(\frac{2\theta}{3(1-\theta)} + \frac{2}{3}\right)^{k-k_0}} = \Theta\left(\exp\left(-\left(\frac{2\theta}{3(1-\theta)} + \frac{2}{3}\right)^{k-k_0}\right)\right). \quad (29)$$

Since  $\|\mathbf{x}_k - \bar{\mathbf{x}}\| \leq \Delta_k$ , it follows that  $\|\mathbf{x}_k - \bar{\mathbf{x}}\|$  converges to zero super-linearly as desired.

**Cases 3 & 4.**

We first derive another estimate on  $\Delta_k$  that generally holds for both cases 3 and 4, and then separately consider cases 3 and 4, respectively.

Fix  $\gamma \in (0, 1)$  and consider  $k \geq k_0$ . Suppose that  $\|\mathbf{x}_{k+1} - \mathbf{x}_k\| \geq \gamma\|\mathbf{x}_k - \mathbf{x}_{k-1}\|$ , then eq. (23) can be rewritten as

$$\|\mathbf{x}_{k+1} - \mathbf{x}_k\| \leq \frac{C}{\gamma^2} (\varphi(r_k) - \varphi(r_{k+1})) \quad (30)$$

for some constant  $C > 0$ . Otherwise, we have  $\|\mathbf{x}_{k+1} - \mathbf{x}_k\| \leq \gamma\|\mathbf{x}_k - \mathbf{x}_{k-1}\|$ . Combing these two inequalities yields that

$$\|\mathbf{x}_{k+1} - \mathbf{x}_k\| \leq \gamma\|\mathbf{x}_k - \mathbf{x}_{k-1}\| + \frac{C}{\gamma^2} (\varphi(r_k) - \varphi(r_{k+1})). \quad (31)$$

Summing the above inequality over  $k = k_0, \dots, n$  yields that

$$\sum_{k=k_0}^n \|\mathbf{x}_{k+1} - \mathbf{x}_k\| \leq \gamma \sum_{k=k_0}^n \|\mathbf{x}_k - \mathbf{x}_{k-1}\| + \frac{C}{\gamma^2} (\varphi(r_{k_0}) - \varphi(r_{n+1})) \quad (32)$$

$$\leq \gamma \left[ \sum_{k=k_0}^n \|\mathbf{x}_{k+1} - \mathbf{x}_k\| + \|\mathbf{x}_{k_0} - \mathbf{x}_{k_0-1}\| \right] + \frac{C}{\gamma^2} \varphi(r_{k_0}). \quad (33)$$

Rearranging the above inequality yields that

$$\sum_{k=k_0}^n \|\mathbf{x}_{k+1} - \mathbf{x}_k\| \leq \frac{\gamma}{1-\gamma} \|\mathbf{x}_{k_0} - \mathbf{x}_{k_0-1}\| + \frac{C}{\gamma^2(1-\gamma)} \varphi(r_{k_0}). \quad (34)$$

Recall  $\Delta_k := \sum_{i=k}^{\infty} \|\mathbf{x}_{i+1} - \mathbf{x}_i\| < +\infty$ . Letting  $n \rightarrow \infty$  in the above inequality yields that for all sufficiently large  $k$

$$\Delta_k \leq \frac{\gamma}{1-\gamma}(\Delta_{k-1} - \Delta_k) + \frac{C}{\gamma^2(1-\gamma)\theta} r_k^\theta \quad (35)$$

$$\stackrel{(i)}{\leq} \frac{\gamma}{1-\gamma}(\Delta_{k-1} - \Delta_k) + \frac{C}{\gamma^2(1-\gamma)\theta} \|\mathbf{x}_k - \mathbf{x}_{k-1}\|^{\frac{2\theta}{1-\theta}} \quad (36)$$

$$\leq \frac{\gamma}{1-\gamma}(\Delta_{k-1} - \Delta_k) + \frac{C}{\gamma^2(1-\gamma)\theta} (\Delta_{k-1} - \Delta_k)^{\frac{2\theta}{1-\theta}}, \quad (37)$$

where (i) uses the KL property and the dynamics of CR, i.e.,  $r_k \leq C\|\nabla f(\mathbf{x}_k)\|^{\frac{1}{1-\theta}} \leq C\|\mathbf{x}_k - \mathbf{x}_{k-1}\|^{\frac{2}{1-\theta}}$ .

**Case 3:**  $\theta = \frac{1}{3}$ . In this case,  $\frac{2\theta}{1-\theta} = 1$  and eq. (37) implies that  $\Delta_k \leq C(\Delta_{k-1} - \Delta_k)$  for all sufficiently large  $k$ , i.e.,  $\Delta_k$  converges to zero linearly as  $\Delta_k \leq (\frac{C}{1+C})^{k-k_0} \Delta_{k_0}$ . The desired result follows since  $\|\mathbf{x}_k - \bar{\mathbf{x}}\| \leq \Delta_k$ .

**Case 4:**  $\theta \in (0, \frac{1}{3})$ . In this case,  $0 < \frac{2\theta}{1-\theta} < 1$  and eq. (37) can be asymptotically rewritten as  $\Delta_k \leq \frac{C}{\gamma^2(1-\gamma)\theta} (\Delta_{k-1} - \Delta_k)^{\frac{2\theta}{1-\theta}}$ . This further implies that

$$\Delta_k^{\frac{1-\theta}{2\theta}} \leq C(\Delta_{k-1} - \Delta_k) \quad (38)$$

for some constant  $C > 0$ . Define  $h(t) = t^{-\frac{1-\theta}{2\theta}}$  and fix  $\beta > 1$ . Suppose first that  $h(\Delta_k) \leq \beta h(\Delta_{k-1})$ . Then the above inequality implies that

$$1 \leq C \frac{\Delta_{k-1} - \Delta_k}{\Delta_k^{\frac{1-\theta}{2\theta}}} = C(\Delta_{k-1} - \Delta_k)h(\Delta_k) \leq C\beta(\Delta_{k-1} - \Delta_k)h(\Delta_{k-1}) \quad (39)$$

$$\leq C\beta \int_{\Delta_k}^{\Delta_{k-1}} h(t)dt = C\beta \frac{2\theta}{3\theta-1} (\Delta_{k-1}^{\frac{3\theta-1}{2\theta}} - \Delta_k^{\frac{3\theta-1}{2\theta}}). \quad (40)$$

Set  $\mu := \frac{1-3\theta}{2C\beta\theta} > 0$ ,  $\nu := \frac{3\theta-1}{2\theta} < 0$ . Then the above inequality can be rewritten as

$$\Delta_k^\nu - \Delta_{k-1}^\nu \geq \mu. \quad (41)$$

Now suppose  $h(\Delta_k) > \beta h(\Delta_{k-1})$ , which implies that  $\Delta_k < q\Delta_{k-1}$  with  $q = \beta^{-\frac{2\theta}{1-\theta}} \in (0, 1)$ . Then, we conclude that  $\Delta_k^\nu \geq q^\nu \Delta_{k-1}^\nu$  and hence  $\Delta_k^\nu - \Delta_{k-1}^\nu \geq (q^\nu - 1)\Delta_{k-1}^\nu$ . Since  $q^\nu - 1 > 0$  and  $\Delta_{k-1}^\nu \rightarrow +\infty$ , there must exist  $\bar{\mu} > 0$  such that  $(q^\nu - 1)\Delta_{k-1}^\nu \geq \bar{\mu}$  for all sufficiently large  $k$ . Thus, we conclude that  $\Delta_k^\nu - \Delta_{k-1}^\nu \geq \bar{\mu}$ . Combining two cases, we obtain that for all sufficiently large  $k$ ,

$$\Delta_k^\nu - \Delta_{k-1}^\nu \geq \min\{\mu, \bar{\mu}\}. \quad (42)$$

Telescoping the above inequality over  $k = k_0, \dots, k$  yields that

$$\Delta_k \leq [\Delta_{k_0}^\nu + \min\{\mu, \bar{\mu}\}(k - k_0)]^{\frac{1}{\nu}} \leq \left(\frac{C}{k - k_0}\right)^{\frac{2\theta}{1-3\theta}}, \quad (43)$$

where  $C$  is a certain positive constant. The desired result then follows from the fact that  $\|\mathbf{x}_k - \bar{\mathbf{x}}\| \leq \Delta_k$ .  $\square$

## Proof of Proposition 1

**Proposition 1.** Denote  $\Omega$  as the set of second-order stationary points of  $f$ . Let Assumption 1 hold and assume that  $f$  satisfies the KL property. Then, there exist  $\kappa, \varepsilon, \lambda > 0$  such that for all  $\mathbf{x} \in \{\mathbf{z} \in \mathbb{R}^d : \text{dist}_\Omega(\mathbf{z}) < \varepsilon, f_\Omega < f(\mathbf{z}) < f_\Omega + \lambda\}$ , the following property holds.

$$(KL\text{-error bound}) \quad \text{dist}_\Omega(\mathbf{x}) \leq \kappa \|\nabla f(\mathbf{x})\|^{\frac{\theta}{1-\theta}}. \quad (8)$$

*Proof.* The proof idea follows from that in Yue et al. (2018). Consider any  $\mathbf{x} \in \Omega^c \cap \{\mathbf{x} \in \mathbb{R}^d : \text{dist}_\Omega(\mathbf{x}) < \varepsilon, f_\Omega < f(\mathbf{x}) < f_\Omega + \lambda\}$ , and consider the following differential equation

$$\mathbf{u}(0) = \mathbf{x}, \quad \dot{\mathbf{u}}(t) = -\nabla f(\mathbf{u}(t)), \quad \forall t > 0. \quad (44)$$

As  $\nabla f$  is continuously differentiable, it is Lipschitz on every compact set. Thus, by the Picard-Lindelöf theorem (Hartman, 2002, Theorem II.1.1), there exists  $\nu > 0$  such that eq. (44) has a unique solution  $\mathbf{u}_\mathbf{x}(t)$  over the interval  $[0, \nu]$ . Define  $\Delta(t) := f(\mathbf{u}_\mathbf{x}(t)) - f_\Omega$ . Note that  $\Delta(t) > 0$  for  $t \in [0, \nu]$ , as otherwise there exists  $\hat{t} \in [0, \nu]$  such that  $\mathbf{u}_\mathbf{x}(\hat{t}) \in \Omega$  and hence  $\mathbf{u}_\mathbf{x} \equiv \mathbf{u}_\mathbf{x}(\hat{t}) \in \Omega$  is the unique solution to eq. (44). This contradicts the fact that  $\mathbf{u}(0) \in \Omega^c$ .

Using eq. (44) and the chain rule, we obtain that for all  $t \in [0, \nu]$

$$\dot{\Delta}(t) = \langle \nabla f(\mathbf{u}_\mathbf{x}(t)), \dot{\mathbf{u}}_\mathbf{x}(t) \rangle = -\|\nabla f(\mathbf{u}_\mathbf{x}(t))\| \|\dot{\mathbf{u}}_\mathbf{x}(t)\|. \quad (45)$$

Applying the KL property in eq. (3) to the above equation yields that

$$\dot{\Delta}(t) \leq -\left(\frac{\Delta(t)}{C}\right)^{1-\theta} \|\dot{\mathbf{u}}_\mathbf{x}(t)\|, \quad (46)$$

where  $C > 0$  is a certain universal constant. Since  $\Delta(t) > 0$ , eq. (46) can be rewritten as

$$\|\dot{\mathbf{u}}_\mathbf{x}(t)\| \leq -\frac{C^{1-\theta}}{\theta} (\Delta(t)^\theta)'. \quad (47)$$

Based on the above inequality, for any  $0 \leq a < b < \nu$  we obtain that

$$\begin{aligned} \|\mathbf{u}_\mathbf{x}(b) - \mathbf{u}_\mathbf{x}(a)\| &= \left\| \int_a^b \dot{\mathbf{u}}_\mathbf{x}(t) dt \right\| \leq \int_a^b \|\dot{\mathbf{u}}_\mathbf{x}(t)\| dt \\ &\leq -\int_a^b \frac{C^{1-\theta}}{\theta} [\Delta(t)^\theta]' dt = \frac{C^{1-\theta}}{\theta} [\Delta(a)^\theta - \Delta(b)^\theta]. \end{aligned} \quad (48)$$

In particular, setting  $a = 0$  in eq. (48) and noting that  $\mathbf{u}_\mathbf{x}(0) = \mathbf{x}$ , we further obtain that

$$\|\mathbf{u}_\mathbf{x}(b) - \mathbf{x}\| \leq \frac{C^{1-\theta}}{\theta} (f(\mathbf{x}) - f_\Omega)^\theta. \quad (49)$$

Next, we show that  $\nu = +\infty$ . Suppose  $\nu < +\infty$ , then (Hartman, 2002, Corollary II.3.2) shows that  $\|\mathbf{u}_\mathbf{x}(t)\| \rightarrow +\infty$  as  $t \rightarrow \nu$ . However, eq. (49) implies that

$$\|\mathbf{u}_\mathbf{x}(t)\| \leq \|\mathbf{x}\| + \|\mathbf{u}_\mathbf{x}(t) - \mathbf{x}\| \leq \|\mathbf{x}\| + \frac{C^{1-\theta}}{\theta} (f(\mathbf{x}) - f_\Omega)^\theta < +\infty,$$

which leads to a contradiction. Thus,  $\nu = +\infty$ .

Since  $\dot{\Delta}(t) \leq 0$ ,  $\Delta(t)$  is non-increasing. Hence, the nonnegative sequence  $\{\Delta(t)\}$  has a limit. Then, eq. (48) further implies that  $\{\mathbf{u}_\mathbf{x}(t)\}$  is a Cauchy sequence and hence has a limit  $\mathbf{u}_\mathbf{x}(\infty)$ .

Suppose  $\nabla f(\mathbf{u}_\mathbf{x}(\infty)) \neq \mathbf{0}$ . Then we obtain that  $\lim_{t \rightarrow \infty} \dot{\Delta}(t) = -\|\nabla f(\mathbf{u}_\mathbf{x}(\infty))\|^2 < 0$ , which contradicts the fact that  $\lim_{t \rightarrow \infty} \Delta(t)$  exists. Thus,  $\nabla f(\mathbf{u}_\mathbf{x}(\infty)) = \mathbf{0}$ , and this further implies that  $\mathbf{u}_\mathbf{x}(\infty) \in \Omega$ ,  $f(\mathbf{u}_\mathbf{x}(\infty)) = f_\Omega$  by the KL property in eq. (3). We then conclude that

$$\text{dist}_\Omega(\mathbf{x}) \leq \|\mathbf{x} - \mathbf{u}_\mathbf{x}(\infty)\| = \lim_{t \rightarrow \infty} \|\mathbf{x} - \mathbf{u}_\mathbf{x}(t)\| \leq \frac{C^{1-\theta}}{\theta} (f(\mathbf{x}) - f_\Omega)^\theta. \quad (50)$$

Combining the above inequality with the KL property in eq. (3), we obtain the desired KL error bound.  $\square$

## Proof of Proposition 2

**Proposition 2.** Denote  $\Omega$  as the set of second-order stationary points of  $f$ . Let Assumption 1 hold and assume that problem (P) satisfies the KL property. Then, there exists a sufficiently large  $k_0 \in \mathbb{N}$  such that for all  $k \geq k_0$  the sequence  $\{\text{dist}_\Omega(\mathbf{x}_k)\}_k$  generated by CR satisfies

1. If  $\theta = 1$ , then  $\text{dist}_\Omega(\mathbf{x}_k) \rightarrow 0$  within finite number of iterations;
2. If  $\theta \in (\frac{1}{3}, 1)$ , then  $\text{dist}_\Omega(\mathbf{x}_k) \rightarrow 0$  super-linearly as  $\text{dist}_\Omega(\mathbf{x}_k) \leq \Theta\left(\exp\left(-\left(\frac{2\theta}{1-\theta}\right)^{k-k_0}\right)\right)$ ;
3. If  $\theta = \frac{1}{3}$ , then  $\text{dist}_\Omega(\mathbf{x}_k) \rightarrow 0$  linearly as  $\text{dist}_\Omega(\mathbf{x}_k) \leq \Theta\left(\exp\left(-(k-k_0)\right)\right)$ ;
4. If  $\theta \in (0, \frac{1}{3})$ , then  $\text{dist}_\Omega(\mathbf{x}_k) \rightarrow 0$  sub-linearly as  $\text{dist}_\Omega(\mathbf{x}_k) \leq \Theta\left((k-k_0)^{-\frac{2\theta}{1-3\theta}}\right)$ .

*Proof.* We prove the theorem case by case.

**Case 1:**  $\theta = 1$ .

We have proved in Theorem 4 that  $\mathbf{x}_k \rightarrow \bar{\mathbf{x}} \in \Omega$  within finite number of iterations. Since  $\text{dist}_\Omega(\mathbf{x}_k) \leq \|\mathbf{x}_k - \bar{\mathbf{x}}\|$ , we conclude that  $\text{dist}_\Omega(\mathbf{x}_k)$  converges to zero within finite number of iterations.

**Case 2:**  $\theta \in (\frac{1}{3}, 1)$ .

By the KL error bound in Proposition 1, we obtain that

$$\text{dist}_\Omega(\mathbf{x}_{k+1}) \leq C\|\nabla f(\mathbf{x}_{k+1})\|^{\frac{\theta}{1-\theta}} \leq C\|\mathbf{x}_{k+1} - \mathbf{x}_k\|^{\frac{2\theta}{1-\theta}}, \quad (51)$$

where the last inequality uses the dynamics of CR in Table 1. On the other hand, (Yue et al., 2018, Lemma 1) shows that

$$\|\mathbf{x}_{k+1} - \mathbf{x}_k\| \leq C\text{dist}_\Omega(\mathbf{x}_k). \quad (52)$$

Combining eq. (51) and eq. (52) yields that

$$\text{dist}_\Omega(\mathbf{x}_{k+1}) \leq C\text{dist}_\Omega(\mathbf{x}_k)^{\frac{2\theta}{1-\theta}}. \quad (53)$$

Note that in this case we have  $\frac{2\theta}{1-\theta} > 1$ . Thus,  $\text{dist}_\Omega(\mathbf{x}_k)$  converges to zero super-linearly as desired.

**Cases 3 & 4:**  $\theta \in (0, \frac{1}{3}]$ .

Note that  $\text{dist}_\Omega(\mathbf{x}_k) \leq \|\mathbf{x}_k - \bar{\mathbf{x}}\|$ . The desired results follow from Cases 3 & 4 in Theorem 4.  $\square$

## Proof of Theorem 1

**Theorem 1.** Let Assumption 1 hold and assume that problem (P) satisfies the KL property associated with parameter  $\theta \in (0, 1]$ . Then, there exists a sufficiently large  $k_0 \in \mathbb{N}$  such that for all  $k \geq k_0$  the sequence  $\{\mu(\mathbf{x}_k)\}_k$  generated by CR satisfies

1. If  $\theta = 1$ , then  $\mu(\mathbf{x}_k) \rightarrow 0$  within finite number of iterations;
2. If  $\theta \in (\frac{1}{3}, 1)$ , then  $\mu(\mathbf{x}_k) \rightarrow 0$  super-linearly as  $\mu(\mathbf{x}_k) \leq \Theta\left(\exp\left(-\left(\frac{2\theta}{1-\theta}\right)^{k-k_0}\right)\right)$ ;
3. If  $\theta = \frac{1}{3}$ , then  $\mu(\mathbf{x}_k) \rightarrow 0$  linearly as  $\mu(\mathbf{x}_k) \leq \Theta\left(\exp\left(-(k-k_0)\right)\right)$ ;
4. If  $\theta \in (0, \frac{1}{3})$ , then  $\mu(\mathbf{x}_k) \rightarrow 0$  sub-linearly as  $\mu(\mathbf{x}_k) \leq \Theta\left((k-k_0)^{-\frac{2\theta}{1-3\theta}}\right)$ .

*Proof.* By the dynamics of CR in Table 1, we obtain that

$$\|\nabla f(\mathbf{x}_{k+1})\| \leq \frac{L+M}{2}\|\mathbf{x}_{k+1} - \mathbf{x}_k\|^2, \quad (54)$$

$$-\lambda_{\min}(\nabla^2 f(\mathbf{x}_{k+1})) \leq \frac{2L+M}{2}\|\mathbf{x}_{k+1} - \mathbf{x}_k\|. \quad (55)$$

The above two inequalities imply that  $\mu(\mathbf{x}_k) \leq \|\mathbf{x}_{k+1} - \mathbf{x}_k\|$ . Also, (Yue et al., 2018, Lemma 1) shows that  $\|\mathbf{x}_{k+1} - \mathbf{x}_k\| \leq C\text{dist}_\Omega(\mathbf{x}_k)$ . Then, the desired convergence result for  $\mu(\mathbf{x}_k)$  follows from Proposition 2.  $\square$
